# Supplementary material
Source: publisher figshare collection journal article supplement (https://gsajournals.figshare.com/ndownloader/files/25800089)
Supplement: Supplementary file 1 [file 25800089]

## Sheet: Sheet1
Cluster 2		Sub-cluster 2A		Core 2			Cluster 7		Core 7			Cluster 9		Core Cluster 9
cut	NES>6	cut		cut			longitudinals lacking		longitudinals lacking	NES>6		GATAe (-)		trident
onecut	NES>5	onecut	NES>5	onecut	NES>6		DNA replication-related element factor	NES>5	DNA replication-related element factor			grain		CG33260
glass	NES>4	glass	NES>4	glass	NES>4		Usf		Usf			serpent		rotund
trident (-)		sloppy paired 1		longitudinals lacking			Max		Max			pannier		pou domain motif 3
CG33260		sloppy paired 2		sloppy paired 1			tango		tango			Sirtuin 6	NES>4	CG3407
sloppy paired 1		forkhead box, sub-group O		sloppy paired 2			cycle		cycle			Enhancer of bithorax		fruitless
sloppy paired 2		fork head		forkhead box, sub-group O			Sterol regulatory element binding protein		Sterol regulatory element binding protein			trident		pebbled
forkhead box, sub-group O		nejire		TATA binding protein			Mitf		Mitf			CG33260		14-3-3zeta	NES>4
rotund		Ecdysone-induced protein 74EF		rotund			taiman		taiman			Sox102F		pannier
pou domain motif 3		Ecdysone receptor		pou domain motif 3			Activating transcription factor 3		Activating transcription factor 3	NES>5		cropped		zeste
CG3407		pebbled		CG3407			cropped		Activating transcription factor-2			rotund		boule
fruitless		rotund		fruitless			Activating transcription factor-2		Jun-related antigen			abrupt		grain
pebbled		pou domain motif 3		pebbled			Jun-related antigen		Cyclic-AMP response element binding protein B			pou domain motif 3		Enhancer of bithorax
achaete		CG3407		nejire	NES>3		Cyclic-AMP response element binding protein B		cropped			broad		Sox102F
asense		fruitless					Atf6		Methoprene-tolerant			SoxNeuro		scute
atonal		achaete					Methoprene-tolerant	NES>4	Atf6	NES>4		E2F transcription factor		achaete
cropped		asense					Myocyte enhancer factor 2		Chorion factor 2			araucan (iro)		asense
daughterless		atonal					Chorion factor 2		germ cell-expressed bHLH-PAS			CG3407		lethal of scute
absent MD neurons and olfactory sensilla		cropped					absent MD neurons and olfactory sensilla		Mnt			Pox meso		RunxB
lethal of scute		daughterless					nautilus (MyoD)		Enhancer of split m8, helix-loop-helix			poils au dos		runt
nautilus (MyoD)		absent MD neurons and olfactory sensilla					daughterless		daughterless			fruitless		RunxA
scute		lethal of scute					Mnt		biniou (-)			pebbled		lozenge
cousin of atonal		nautilus (MyoD)					germ cell-expressed bHLH-PAS		E2F transcription factor 1			boule		Sterol regulatory element binding protein
pangolin		scute					biniou (-)		E2F transcription factor 2			absent MD neurons and olfactory sensilla		abrupt
Ets at 65A (-)		cousin of atonal					Enhancer of split m8, helix-loop-helix		DP transcription factor			nautilus (MyoD)		broad
Ecdysone-induced protein 74EF		hat-trick					E2F transcription factor 1		Myocyte enhancer factor 2			ventral veins lacking		Forkhead box K
anterior open		48 related 1 (-)					E2F transcription factor 2		TATA binding protein			Zinc-finger protein	NES>3	Adult enhancer factor 1
stripe		snail					DP transcription factor		absent MD neurons and olfactory sensilla					CG4360
Enhancer of bithorax		escargot					TATA binding protein		nautilus (MyoD)					Chorion factor 2
SoxNeuro		net					TBP-associated factor 1		Topoisomerase 2					E2F transcription factor	NES>3
fork head		pleiohomeotic					Hr4		gemini
hat-trick	NES>3	pleiohomeotic like					Hormone receptor-like in 39		Ecdysone-induced protein 78C
		Ets at 65A (-)					ftz transcription factor 1		estrogen-related receptor
		anterior open					Topoisomerase 2		knirps
		zeste					Ecdysone-induced protein 78C		Hr4
		stripe					estrogen-related receptor		eagle
		pangolin					knirps		Hormone receptor-like in 46
		Enhancer of bithorax					eagle		knirps-like
		tramtrack					Hormone receptor-like in 46		Hormone receptor-like in 39
		klumpfuss	NES>3				knirps-like		ftz transcription factor 1
							Spargel		Spargel
							Optix		Enhancer of split mγ, helix-loop-helix
							gemini		deadpan
							Hormone receptor-like in 38 (-)		TBP-associated factor 1
							broad	NES>3	Hormone receptor-like in 38 (-)	NES>3
